# Supplementary material for: Identification of Circular RNA hsa_Circ_0003391 in Peripheral Blood Is Potentially Associated With Alzheimer's Disease
Source: PubMed Central journal article supplement (PMC7793744; doi:10.3389/fnagi.2020.601965), 2020-12-18
Supplement: Data_Sheet_1.pdf [file Data_Sheet_1.pdf]

## Supplementary Figures

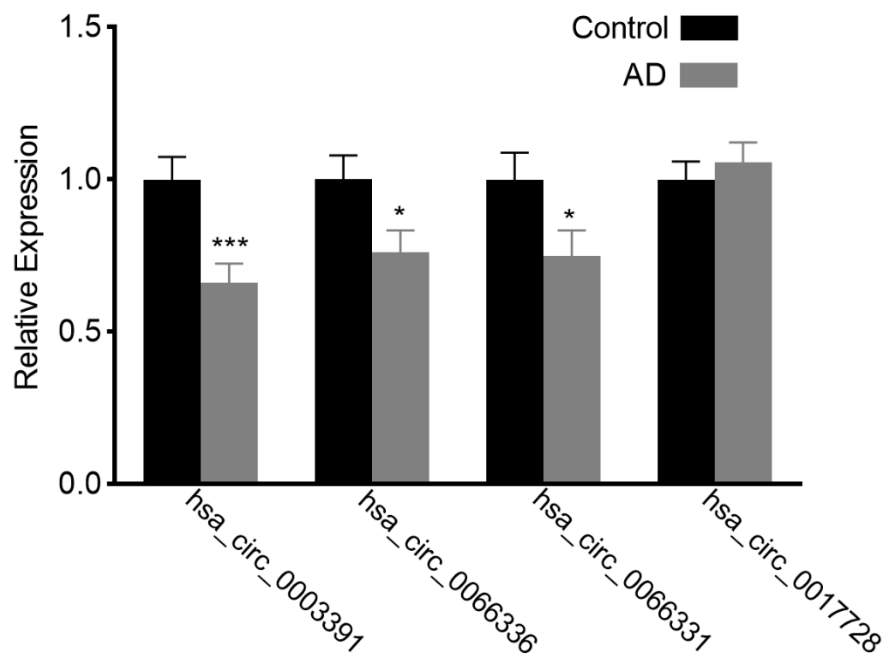

**Supplementary Figure 1.** Relative change in gene expression were determined by using a  $2^{-\Delta\Delta CT}$  method. \*  $p < 0.05$ , \*\*\*  $p < 0.001$



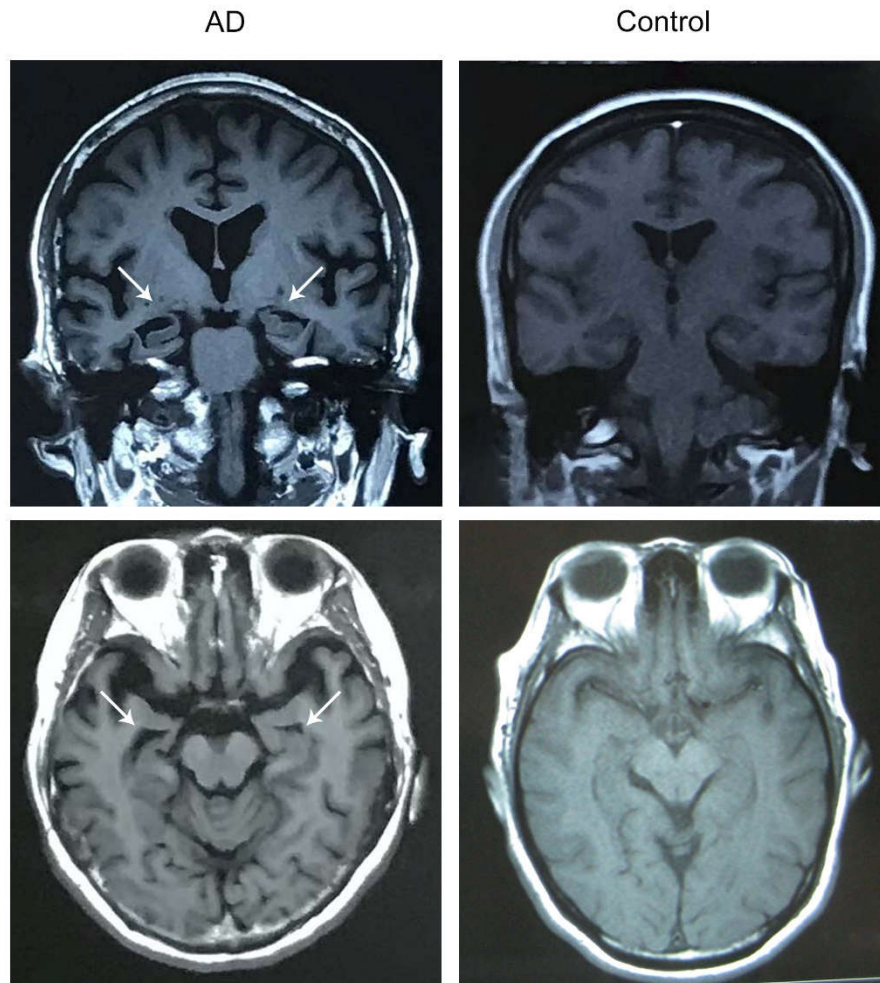

**Supplementary Figure 3.** Typical neuroimaging of the MRI showed that the hippocampus with the patient suffering from AD displayed an obvious atrophy compared with age-matched healthy controls.
